# Supplementary material for: Brief communication: Glacier run-off estimation using altimetry derived basin volume change: case study at Humboldt Glacier, Northwest Greenland
Source: Copernicus journal article supplement (doi:10.5194/tc-2020-220), 2020-09-04
Supplement: Supplementary file 1 [file Supplementary Images.docx]

Supplementary Images

These 2019 images of the melt season of the Humboldt Glacier are from the 6-day mosaics of ESA Sentinel imagery assembled by Ian Joughin (Joughin, 2017) and available from the NSIDC MEaSUREs web site. The annotated date on the lower edge of each image is the date in the middle of the period.

Joughin, I. 2017, updated 2019*.* MEaSUREs Greenland Image Mosaics from Sentinel-1A and -1B, Version 2*.*2. Boulder, Colorado USA. NASA National Snow and Ice Data Center Distributed Active Archive Center. doi: <https://doi.org/10.5067/GPVL3SACPBW4>. [Last accessed July 2020].
