# Supplementary material for: Brief communication: Glacier run-off estimation using altimetry derived basin volume change: case study at Humboldt Glacier, Northwest Greenland
Source: Copernicus journal article supplement (doi:10.5194/tc-2020-220), 2020-09-04
Supplement: Supplementary file [file tc-2020-220-AC1-supplement.pdf]

I would like to thank both reviewers for the time and care they have taken with their reviews. I think responding to their comments and criticisms has improved the paper. In the following the reviewer comments are in italics and the responses are in standard font.

Reviewer 1.

*This paper uses CryoSat-2 radar altimetry (and OIB ice thickness data and MEaSUREs velocity data) to determine glacier runoff in a northern Greenland glacier basin. The Humboldt is used as a test case for this method.*

*One general comment that I have is that there needs to be more of a discussion on where this method may be applicable. The author describes the melt/water environment as being the key limitation. I'd suggest that here are other limitations that include: latitude, trend and width of the glacier valley, and OIB data availability.*

This is fair comment and section 4.3 'Applicability of this method' has been expanded to cover the other limitations. The revised text is shown below.

#### **4.3 Applicability of this method**

Although data on ice thickness, surface height and velocity are now readily available on the internet, this method for the estimation of water run-off associated with a large glacier does have some limitations; the downstream gate close to the glacier terminus needs to be relatively large (~ 10+ km), and ice thickness and velocity data are required for all the gates. While ice thickness close to the terminus has been measured for many of the large Greenland outlet glaciers, often the ice thickness upstream has not been estimated as accurately. As described earlier, obtaining height change data close to the terminus of many of Greenland's larger glaciers can be challenging due to the relatively large slopes and surface roughness. The derivation of the height change at the gates improves with the number of height estimates. Consequently, the error associated with gate height change may increase in southern Greenland as the coverage by CryoSat degrades due to the sub-satellite track divergence.

If there was a steady input of englacial or subglacial water at the upper gate and an equal amount of water leaving at the lower gate at the same time this would not be detected with this method. However, around Greenland there is both ice discharge and water run-off, and, as the run-off is predominantly seasonal, it can be estimated with this method. However, the method will be more challenging for those areas and glaciers with strongly divergent upstream flowlines.

*While this is intended to be a brief communication, the Height change estimation using CryoSat section probably needs more information to have this paper stand a little more on its own.*

Some extra information has been added particularly in relation to the method by which the temporal height change is estimated. The improved section is added below:

## **2.1 Height change estimation using CryoSat**

CryoSat baseline-C and -D intermediate level SARIn (L1b) data collected from the summer of 2010 to the end of 2019 have been used in this work. Baseline-D files contain small improvements to the satellite roll angle which could affect the output of the swath processing algorithm. However, ESA provided corrections prior to the introduction of baseline-D which were used in the current work. Processing to terrain height and height change was done using the methods described in Gray et al., 2015, 2019. For the lower reaches of the tide-water glaciers I rely primarily on swath mode processing (Gray et al., 2013, Gourmelen et al., 2019). With swath mode processing it is important to select conditions which will minimize the contribution from any unwanted range ambiguous region. For example, when the height and height change of the surface of supra-glacial lakes were mapped using CryoSat swath mode data (Gray et al., 2017), the relatively flat lake provided a strong reflecting surface so that the returns from the lake dominated over any range-ambiguous regions. Consequently, the differential phase reflected the cross-track look angle for the supra-glacial lake and allowed accurate geocoding and height estimation of the lake. In summer, there is a strong probability of wet ice conditions close to the termini of tidewater glaciers, and this can lead to strong specular reflections. By selecting relatively strong waveform returns ( $> -150$  dB) from summer passes there is a strong likelihood that the wet glacier surface will dominate the composite return signal and the differential phase will then more accurately reflect the cross-track look angle and allow accurate geo-coding.

In calculating ice height and temporal height change we need to be able to change both the area over which the change will be measured and also the time interval between average height estimates. There is a trade-off between the size of the patch over which the SARIn data are binned and the ability to extract temporal variation in height change. The shortest practical temporal sampling possible with CryoSat is the 30-day sub-cycle but then a relatively large area is preferred to get adequate averaging (Gray et al., 2019). That approach is not appropriate for the relatively small areas close to the terminus of the Humboldt Glacier so the size of the temporal window has been increased to obtain more samples for averaging. Here, the swath mode height data are sorted into overlapping spatial windows of size 2.4 km by 2.4 km sampled at 1.2 km bin spacing, and a search is done for closely spaced height estimates ( $< 100$  m apart) in a succession of time periods. For the year-to-year height change, data from July 1 to October 15 were used to capture the possibility of strong returns and to minimize the possibility of a varying bias between the surface and the CryoSat detected height (Gray et al., 2019). While the surface height at any point on the glacier will likely change during this period, the relatively large temporal bin is not as big a problem as it might appear. The CryoSat satellite orbit repeats every 369 days, so that when comparing the data from one year to the next, many of the pairs will be close to one year apart in time, and the average of the height change of all the possible pairs within the separation criteria will reflect the yearly height change even when using a temporal window of three and a half months each year. The unit of time for the year-to-year differences is then early fall in one year to the same period in the next.

After binning the height estimates into the 30-day or the year-to-year time periods, the average height change between all the possible time periods is obtained. For any two time periods the average height change is calculated from the height differences of the closely spaced points. The height change

between any two periods is then calculated from the matrix of average height changes using the method outlined in Gray et al. 2015. The result is the weighted average of the direct comparison of two time periods combined with the differences using a third time period. For example, the height change between year 1 and 2 for a specific area uses the height difference for those two years but also the height changes from year 1 and year 3, and year 2 and year 3. Because the data points used in the various comparisons are different, this process gives an independent estimate and leads to a better overall average. In the current work the height difference between any two years in the 10-year span between the Falls of 2010 and 2019 uses a weighted average of the direct difference and the eight differences using a third period. Further details are available from Gray et al. 2015.

While swath mode processing provides results close to the glacier terminus in the region in which the POCA algorithms struggle, at higher elevations the surfaces are smoother, the slopes more moderate, and POCA results tend to have lower random errors and a lower probability of bias errors (Gray et al., 2017). For this reason, POCA results were used at elevations above ~600 m. The method used is similar to the swath processing approach outlined above, although now the spatial bin size is doubled to 4.8 km, the bin spacing is 2.4 km, and the search for pairs of points in the different time bins is carried out for separations less than 400 m. The GIMP DEM (Howat et al., 2014) is used for slope correction (Gray et al., 2019).

*The paper is fairly well written, although it needs a bit of polish that usually comes from having multiple authors and multiple sets of eyes on a manuscript.*

Further editing has been done and the current paper has been read by a person familiar with paper editing.

*I don't think that the title should have a period*

The period has been removed.

*L19: "...synthetic aperture radar (SAR), interferometric SAR (SARIn)..."*

The CryoSat SARIn mode uses what is called 'unfocussed synthetic aperture processing' but to avoid unnecessary jargon and still be accurate in the description of the system the text has been expanded as below...

The interferometric mode on the European Space Agency (ESA) CryoSat satellite was developed in part to alleviate the problems associated with measuring glacial ice height with radar altimeters when surface slopes are relatively large, e.g., at the periphery of the Greenland Ice Sheet. Coherent processing is used in the 'SARIn' mode to achieve an along-track resolution of ~ 380 m, and two cross-track antennas are used for footprint geocoding using interferometric processing (Parrinello et al., 2018).

*L30: I am concerned about differences between baseline C and D. Did you see this? How would differences affect these results?*

The main difference between baselines -C and -D L1b files is the file format, the only important change which could affect the swath processing output is the small

improvement in the satellite roll angle provided in baseline-D. However, prior to the introduction of the baseline-D L1b product, ESA had provided the revised roll angles in an ftp site. Whenever baseline-C files were used in this work the revised roll angles were also used. The change from baseline-C to baseline-D has essentially no impact on the 'POCA' results. The revised text is...

CryoSat baseline-C and -D intermediate level SARIn (L1b) data collected from the summer of 2010 to the end of 2019 have been used in this work. Baseline-D files contain small improvements to the satellite roll angle which could affect the output of the swath processing algorithm. However, ESA provided corrections prior to the introduction of baseline-D which were used in the current work. Processing to terrain height and height change was done using the methods described in Gray et al., 2015, 2019.

*L36-38: This sentence is a bit long and hence a bit confusing. Needs an edit.*

The text for this part of the paper is now as follows...

With swath mode processing it is important to select conditions which will minimize the contribution from any unwanted range ambiguous region. For example, when the height and height change of the surface of supra-glacial lakes were mapped using CryoSat swath mode data (Gray et al., 2017), the relatively flat lake provided a strong reflecting surface so that the returns from the lake dominated over any range-ambiguous regions. Consequently, the differential phase reflected the cross-track look angle for the supra-glacial lake and allowed accurate geocoding and height estimation of the lake.

*L43-50: Somewhere in here, it might be good to acknowledge that this outlet glacier is at a high latitude(79.5 N), providing more data points than you would get from the southern part of the island, simply based on converging satellite ground tracks. It might be good to add a grid or some indication of this (latitude/longitude) in your figure(s).Further, this is a large glacier, with a wide terminus, providing more data points than you would get from more constrained outlets.*

Again, this is a fair criticism and I have expanded section 4.3 'Applicability of the method' to cover this and other issues related to when this approach to estimating run-off is possible.

Both Figure 1 and 3A have been modified to provide height contours, velocity vectors and a latitude/longitude grid has been plotted on the expanded insert map of Greenland in figure 1.

*L49: Why was this time range selected? It seems a little later (both start and finish) than I expected. I now see (on L242) why the October date is chosen; what about the start?*

The time period for the year-to-year CryoSat height change (July 1 to Oct. 15) is somewhat arbitrary but was selected such that there was adequate data during the summer-fall period for the year-to-year comparison. Some tests were done to see how

the results might change as the start and stop dates were changed. This showed that the results were relatively insensitive to the precise start-stop dates.

*L60: Where is the 600 m contour? Below 1000 m the contours can bunch up quickly. This contour (or perhaps the 500 m for continuity) should be added to the figure(s) (especially Fig 1) as well.*

Both figures 1 and 3A have been changed to include the 500 m contour.

*L62: is the choice of 100 m separation for swath mode, vs 400 m for POCA mode purely arbitrary?*

Not really. The choice is based on the footprint size, the 'density' (number per km<sup>2</sup>) of the centres of the footprints, and the time required to run the search programme. Again, some years ago I experimented with different separation criteria and found that the results were relatively insensitive to this number. This is covered in earlier papers and to keep the length of the communication under control I have not explicitly addressed this concern in the rewrite.

*L74 "This is not an issue..." What is not an issue?*

This referred to the need to use height results over a relatively large area to get good statistics for the results for the average 30-day height variation. The 'large area' would be an issue if the surface conditions and height change were changing significantly with position (as it does close to the terminus). I do not expect that the average height change changes much with position in the accumulation zone, hence we can use a relatively large area to study it. The second reviewer also had a more general concern with this section which has led to a more extensive rewrite which also addresses this question. The specific part of the rewrite is now...

To search for height change associated with firn densification it is necessary to use the 30-day temporal sampling and a relatively large area in the accumulation zone, > ~10<sup>3</sup> km<sup>2</sup>. Using a relatively large area is not an issue as conditions in the accumulation zone vary relatively slowly with position.

*L80: Stray sentence. And I think that the comma should be a semicolon.*

The corrected sentence has been moved to the results section.

*L84-85: "Data from both radar...have been used." I take it that this means that these data were used in the MEaSUREs velocity assessments?*

Yes, the data in the NSIDC MEaSUREs Greenland ice velocity web site has been derived from both radar and optical satellites.

*L105-108: it might be good to see the velocity field somewhere. It would help with this sentence and to help the reader see the choices you made for the sides of your glacier domain.*

Figure 3 now includes a 'quiver' plot of the velocity vectors in which the length of the vector is proportional to the square root of the speed.

*L108: "The average ice thicknesses... are...speeds ... are... etc. Also, be consistent with Oxford commas throughout the paper.*

The wording here has been changed to the following and care has been taken throughout the paper to improve my use of commas...

When calculating the flux, the surface speed is normally used as the depth averaged speed whenever the surface speed is  $\sim 100$  m/year or larger (Mankoff et al., 2020). The flux estimates through gates 3 and 4 have used fractions of the surface speed to account for the possibility that the depth averaged speed is less than the surface speed. For gate 3 the fractions were 0.95, .975, and 1, and 0.9, .95 and 1 for gate 4. The different fractions are used to estimate the potential error arising from the uncertainty in the depth averaged velocity.

*L109: Mankoff et al., 2018(and Mankoff et al 2019, cited in the Intro) are missing from refs*

The up-to-date reference has been added.

*L112: again, the comma here should be a semicolon. While this phrasing works conversationally, it's really just 2 clauses connected poorly.*

The wording has been changed as above.

*L123: I'd pull this equation out of the paragraph.*

Done.

*L123-136: the subscripts disappear for rho or lose an underscore associated with ice\_in; check for consistency. For rho\_win equation 1 and in the text in L123: should this be included to make the units cancel?*

Yes, this omission was careless and has been fixed.

*L182-183: The basin 2 and basin 3 run-off values look comparable for the entire time series (e.g., 2013-2014). It is fair to say, however, that the error circles are converging; perhaps discuss that? I understand that the larger basin runoff must include the smaller basin runoff, and the smaller basin will never outpace the larger basin, but why do the errors converge?*

The wording here has been changed and expanded here primarily to address a concern from reviewer 2. However, this point is addressed specifically in the errors section as follows...

It is important to note the difference in the way that errors propagate for the different components of the equation for run-off. The mass change term is based on the altimetry derived volume change and the error in the comparing the volume between any two years is approximately the same, i.e., the error in the volume or mass change between 2011 and 2012 is essentially the same as between 2011 and 2019. But this is not the case for the flux estimates where an error in, e.g., the cross-sectional area of an ice gate, will accumulate with time such that the error in flux over nine years could be nine times the error over one year. This is the source of the increasing error estimates with time in Fig. 2D.

*L193: Overall, the error discussion is pretty thorough. More papers should have this level of discussion on errors.*

*L195-196 and L205-207: why is accumulation included in L195 (and not firn densification), while firn densification is included in L206 (and not accumulation)? I am sure that I am missing something, but perhaps some language here to help the reader would be good.*

The uncertainty related to firn densification is implicit in the error assigned to the mass change term. The error in mass change has two components; the error in volume change and the contribution related to the uncertainty in density associated with the volume change. The wording close to lines 196 and 205 has been modified and clarified to better explain this. The new version has been expanded also to address a major concern from reviewer 2.

*L207-208: I don't understand this sentence; some description of this in this reference (as opposed to just in Gray et al., 2019) is needed.*

This sentence has been removed. The rewritten section on processing the CryoSat data now includes an extra paragraph describing the way that temporal height change is calculated and the estimation of the random error in the results.

*L249-252: some mention should be made to 1) CryoSat track spacing (it's denser up north) and 2) the broad nature and orientation (relative to satellite ground tracks) of Humboldt. Both of these things contribute to more satellite data volume.*

This has been addressed in the expanded section 'Applicability of this method'.

*L269: 'ICESat-2'*

Fixed.

*L279: Here you use what I have always considered the more common way of referring to 'CryoSat-2'. And BedMachine now has a capitalized 'M'. Which is it? Perhaps be consistent here.*

The inconsistencies have been fixed. For simplicity I have omitted the -2 in referring to CryoSat.

*Figure 1: as mentioned above, it would be good to have some sort of grid. Also helpful would be to add a contours (like in Figure 3) and include an additional contour between 1000 m and the water.*

Figure 1 and 3A have been changed as requested.

*Figure 2a: remind people of what the 'added values' are, or where they come from, or just point them to the statement in the text.*

*Figure 2c: for consistency, I'd add 'from 3 basins from title'.*

*Figure 2d: my image has 2 x-axes.*

These changes and additions to Fig. 2 have been done.

*Figure 2e: did you exclude basin 3 because basin 2 and 3 have such similar results in 2d?*

Yes.

*Caption: "...the potentially uncertainty*

The caption has been changed.

*Figure3a: add contour down low*

500 m contour added.
